# Supplementary material for: Extensive rainfall data analysis: event separation from continuous record, fitting of theoretical distributions, and event-based trend detection
Source: Royal Society of Chemistry journal article supplement (doi:10.1039/d2va00294a), 2023-01-01
Supplement: d2va00294a1.pdf [file d2va00294a1.pdf]

Electronic Supplementary Material (ESI) for Environmental Science: Advances

## Supplementary Information

### Extensive rainfall data analysis: event separation from continuous record, fitting of theoretical distributions, and event-based trend detection

Aniekan E. Essien<sup>\*a</sup>, Yiping Guo<sup>a</sup>, and Sarah E. Dickson-Anderson<sup>a</sup>

<sup>\*</sup>Corresponding author: Aniekan Essien (essiena@mcmaster.ca)

<sup>a</sup> Department of Civil Engineering, McMaster University, Hamilton, Ontario, Canada, L8S 4L7.

## Table of Contents

|                                                                                                                                                                                                                           |   |
|---------------------------------------------------------------------------------------------------------------------------------------------------------------------------------------------------------------------------|---|
| S1 Visual comparison of the observed frequency, exponential modeling, and gamma modeling of the rainfall event characteristics .....                                                                                      | 1 |
| S2 Year ranking matrix .....                                                                                                                                                                                              | 4 |
| S3 Demi-decade-averaged (5-yearly average) temperature, total number of extreme rainfall events, and total number of interevent times greater than its individual nation station's average interevent time (INSAIT) ..... | 5 |

### S1 Visual comparison of the observed frequency, exponential modeling, and gamma modeling of the rainfall event characteristics

Figs. (S1.1a – S1.1c), (S1.2a – S1.2c), (S1.3a – S1.3c), and (S1.4a – S1.4c) show the visual comparison of the observed frequency, exponential modeling, and gamma modeling of the rainfall event characteristics ( $v$ ,  $t$ , and  $b$ ) with  $v_t \geq 1$  mm for the station in England, Scotland, Wales, and Northern Ireland, respectively

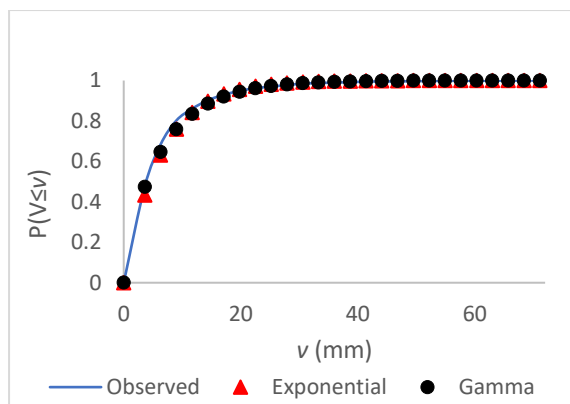

Fig. S1.1a England's station - rainfall event volume CDF plot

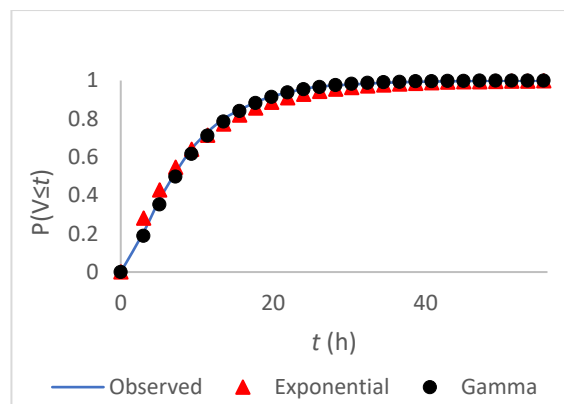

Fig. S1.1b England's station- rainfall event duration CDF plot

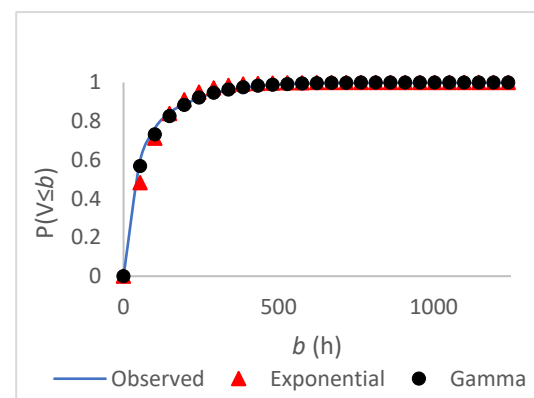

Fig. S1.1c England's station - Interevent time CDF plot

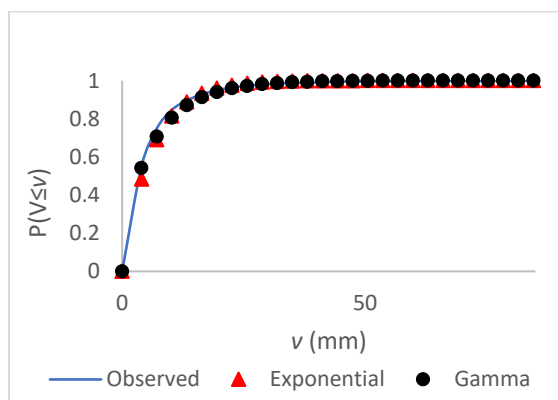

Fig. S1.2a Scotland's station - rainfall event volume CDF plot

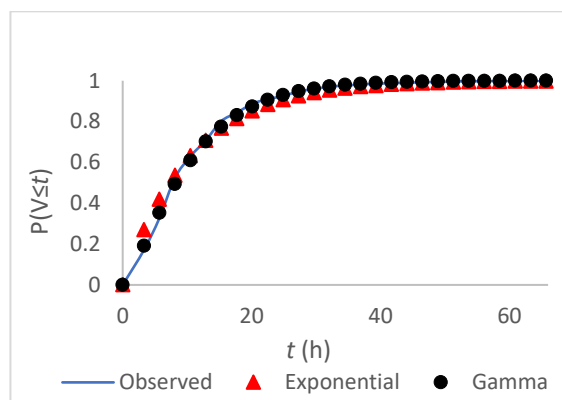

Fig. S1.2b Scotland's station - rainfall event duration CDF plot

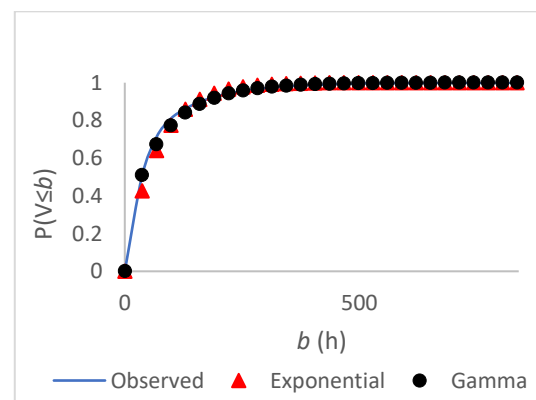

Fig. S1.2c Scotland's station - Interevent time CDF plot

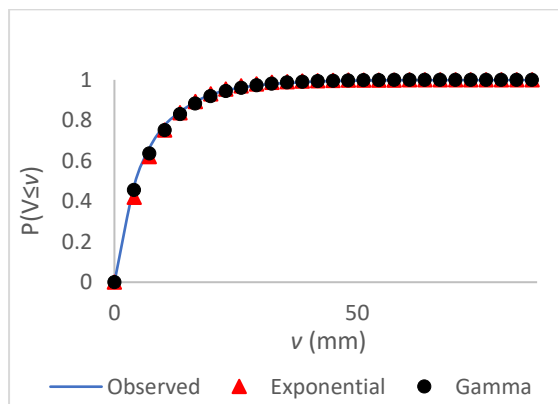

Fig. S1.3a Wales' station - rainfall event volume CDF plot

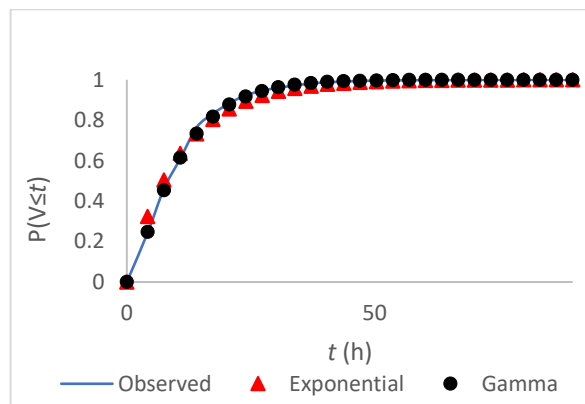

Fig. S1.3b Wales' station - rainfall event duration CDF plot

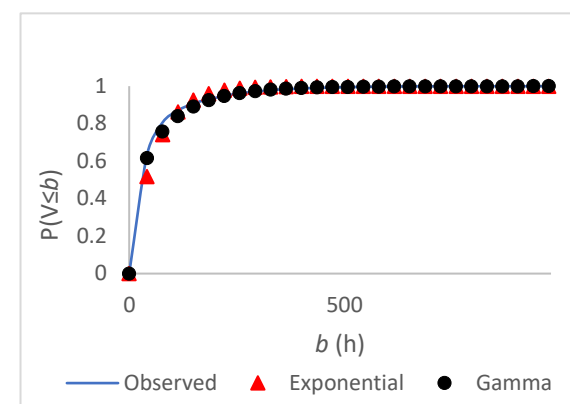

Fig. S1.3c Wales' station - Interevent time CDF plot

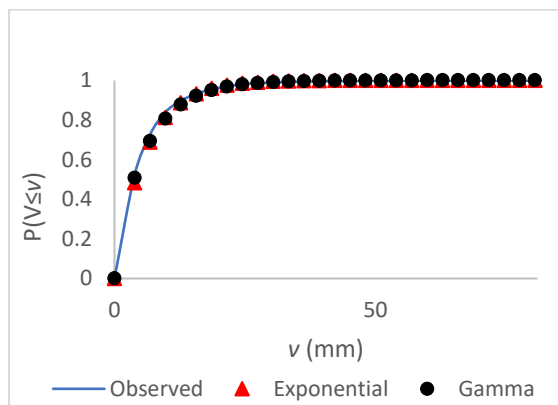

Fig. S1.4a N. Ireland's station - rainfall event volume CDF plot

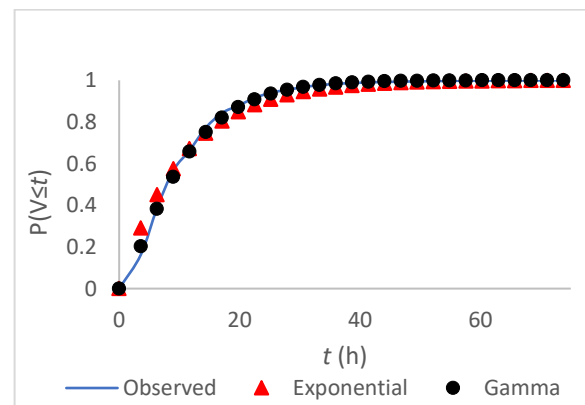

Fig. S1.4b N. Ireland's station - rainfall event duration CDF plot

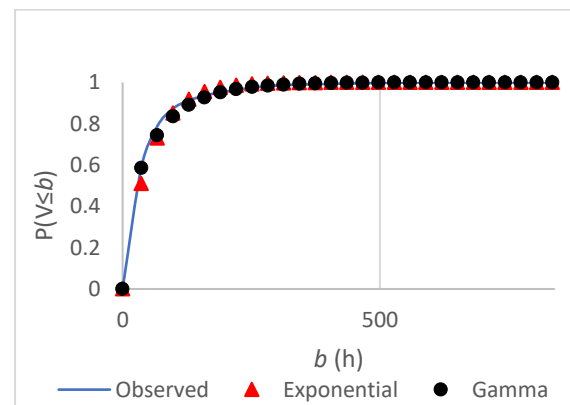

Fig. S1.4c N. Ireland's station - Interevent time CDF plot

**S2 Year ranking matrix**

Table S2.1 provides the ascending order ranking of the 55-year continuous historical climate data recorded in the four nations (England, Scotland, Wales, and Northern Ireland) of the UK.

Table S2.1 Year ranking of the 55-year continuous rainfall data observed in the UK

| Year position | Year    |          |       |                  |
|---------------|---------|----------|-------|------------------|
|               | England | Scotland | Wales | Northern Ireland |
| 1st           | 1949    | 1960     | 1960  | 1960             |
| 2nd           | 1950    | 1961     | 1961  | 1961             |
| 3rd           | 1951    | 1962     | 1962  | 1962             |
| 4th           | 1952    | 1963     | 1963  | 1963             |
| 5th           | 1953    | 1964     | 1964  | 1964             |
| 6th           | 1954    | 1965     | 1965  | 1965             |
| 7th           | 1955    | 1966     | 1966  | 1966             |
| 8th           | 1956    | 1967     | 1967  | 1967             |
| 9th           | 1957    | 1968     | 1969  | 1968             |
| 10th          | 1958    | 1969     | 1970  | 1969             |
| 11th          | 1959    | 1970     | 1971  | 1970             |
| 12th          | 1960    | 1971     | 1972  | 1971             |
| 13th          | 1961    | 1972     | 1973  | 1972             |
| 14th          | 1962    | 1973     | 1974  | 1973             |
| 15th          | 1963    | 1974     | 1975  | 1974             |
| 16th          | 1964    | 1975     | 1976  | 1975             |
| 17th          | 1965    | 1976     | 1977  | 1976             |
| 18th          | 1966    | 1977     | 1979  | 1977             |
| 19th          | 1967    | 1979     | 1980  | 1978             |
| 20th          | 1968    | 1980     | 1981  | 1979             |
| 21st          | 1969    | 1981     | 1982  | 1980             |
| 22nd          | 1970    | 1982     | 1983  | 1981             |
| 23rd          | 1971    | 1983     | 1984  | 1982             |
| 24th          | 1972    | 1984     | 1985  | 1983             |
| 25th          | 1973    | 1985     | 1986  | 1984             |
| 26th          | 1974    | 1986     | 1987  | 1985             |
| 27th          | 1975    | 1987     | 1989  | 1986             |
| 28th          | 1976    | 1988     | 1990  | 1987             |
| 29th          | 1977    | 1989     | 1991  | 1988             |
| 30th          | 1979    | 1990     | 1992  | 1989             |
| 31st          | 1980    | 1991     | 1993  | 1991             |
| 32nd          | 1981    | 1992     | 1994  | 1992             |

|      |      |      |      |      |
|------|------|------|------|------|
| 33rd | 1982 | 1993 | 1995 | 1993 |
| 34th | 1983 | 1994 | 1997 | 1994 |
| 35th | 1984 | 1995 | 1998 | 1995 |
| 36th | 1989 | 1996 | 1999 | 1996 |
| 37th | 1991 | 1997 | 2000 | 1997 |
| 38th | 1992 | 1998 | 2001 | 1998 |
| 39th | 1994 | 2001 | 2002 | 1999 |
| 40th | 1996 | 2003 | 2003 | 2000 |
| 41st | 1997 | 2004 | 2004 | 2001 |
| 42nd | 1998 | 2006 | 2005 | 2002 |
| 43rd | 1999 | 2007 | 2006 | 2003 |
| 44th | 2000 | 2008 | 2007 | 2004 |
| 45th | 2001 | 2009 | 2008 | 2005 |
| 46th | 2002 | 2010 | 2009 | 2006 |
| 47th | 2007 | 2011 | 2010 | 2007 |
| 48th | 2008 | 2012 | 2011 | 2008 |
| 49th | 2009 | 2013 | 2012 | 2009 |
| 50th | 2010 | 2014 | 2013 | 2012 |
| 51st | 2011 | 2015 | 2014 | 2014 |
| 52nd | 2012 | 2016 | 2016 | 2015 |
| 53rd | 2014 | 2017 | 2017 | 2016 |
| 54th | 2015 | 2018 | 2018 | 2017 |
| 55th | 2017 | 2019 | 2019 | 2019 |

### **S3      Demi-decade-averaged (5-yearly average) temperature, total number of extreme rainfall events, and total number of interevent times greater than its individual nation station's average interevent time (INSAIT)**

Fig. S3.1 – S3.4 show the trends of the demi-decade-averaged (5-yearly average) temperature and demi-decade total number of extreme rainfall events observed at the selected weather stations in the four nations, while Fig. S3.5 – S3.8 show the trend plots of the demi-decade-averaged temperature and demi-decade total number of interevent times greater than its individual nation station's average interevent time (INSAIT).

# Electronic Supplementary Material (ESI) for Environmental Science: Advances

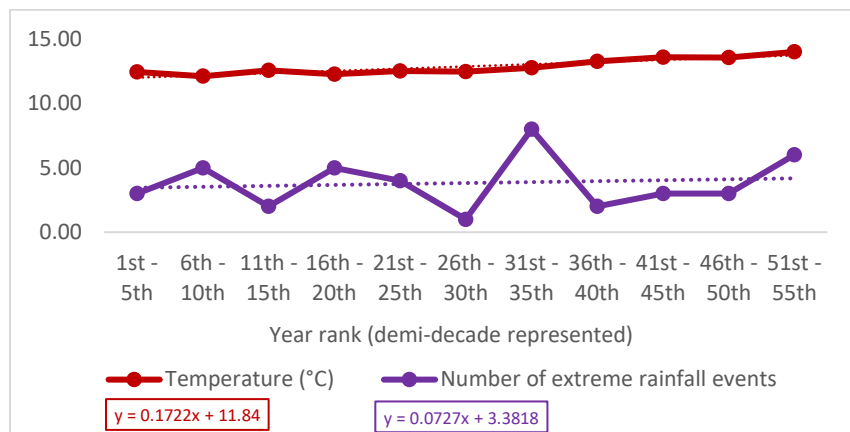

Fig. S3.1 Demi-decade-averaged temperature and demi-decade total number of extreme rainfall events for England's station

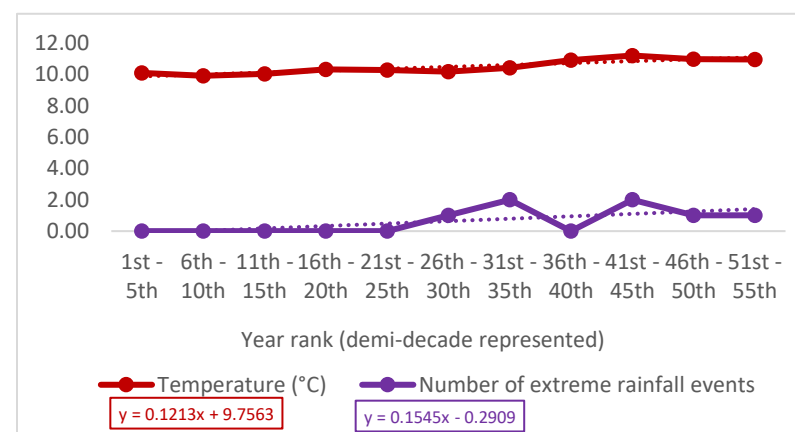

Fig. S3.2 Demi-decade-averaged temperature and demi-decade total number of extreme rainfall events for Scotland's station

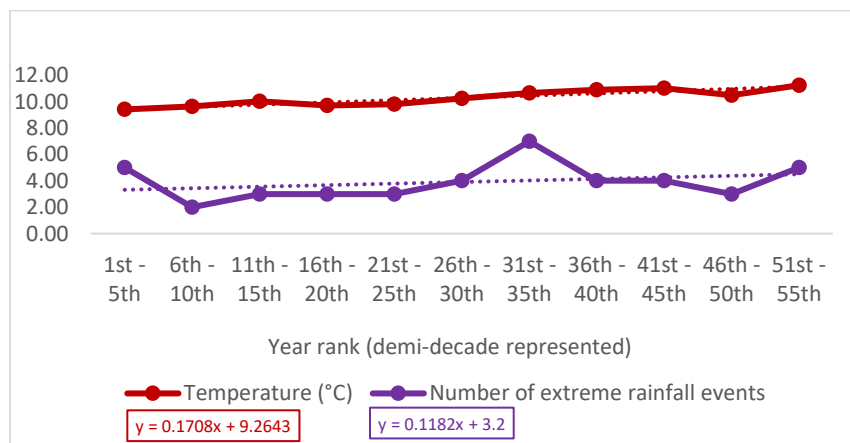

Fig. S3.3 Demi-decade-averaged temperature and demi-decade total number of extreme rainfall events for Wales' station

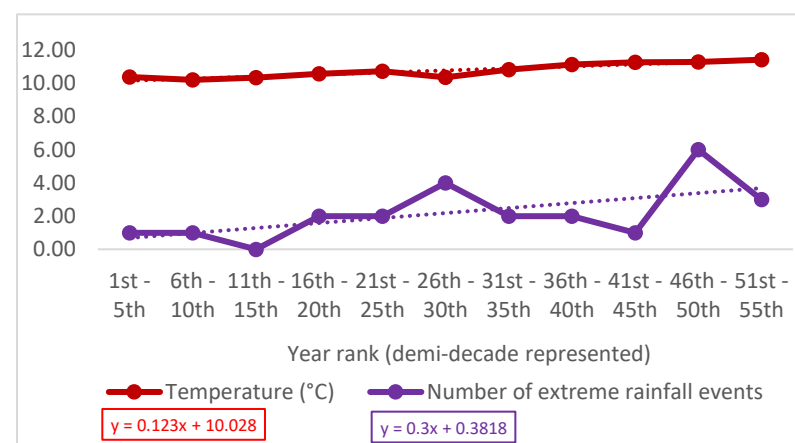

Fig. S3.4 Demi-decade-averaged temperature and demi-decade total number of extreme rainfall events for Northern Ireland's station

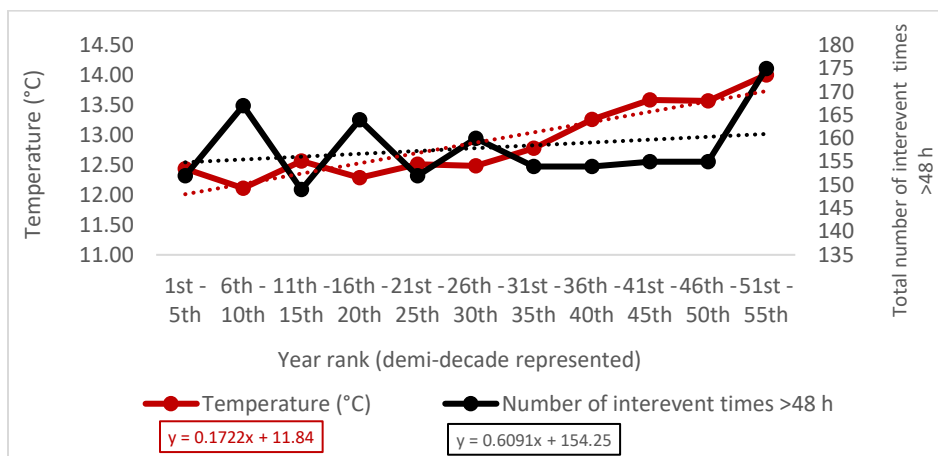

Fig. S3.5 Demi-decade-averaged temperature and demi-decade total number of interevent times > 48 h plot for England's station

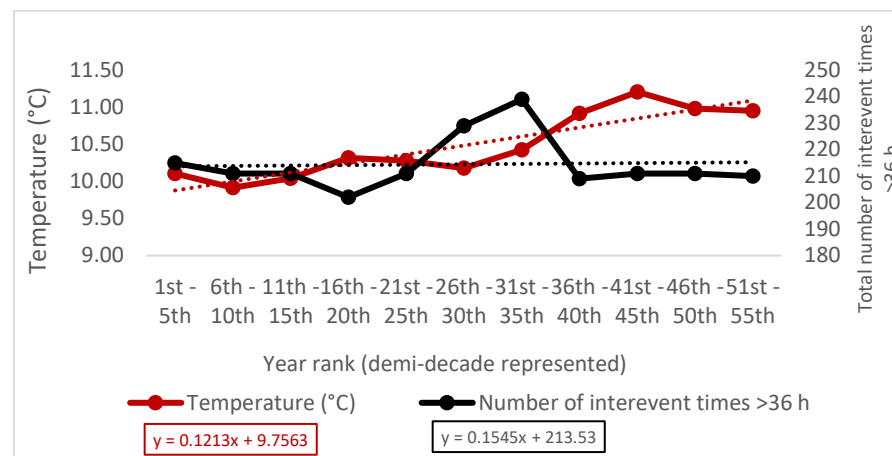

Fig. S3.6 Demi-decade-averaged temperature and demi-decade total number of interevent times > 36 h plot for Scotland's station

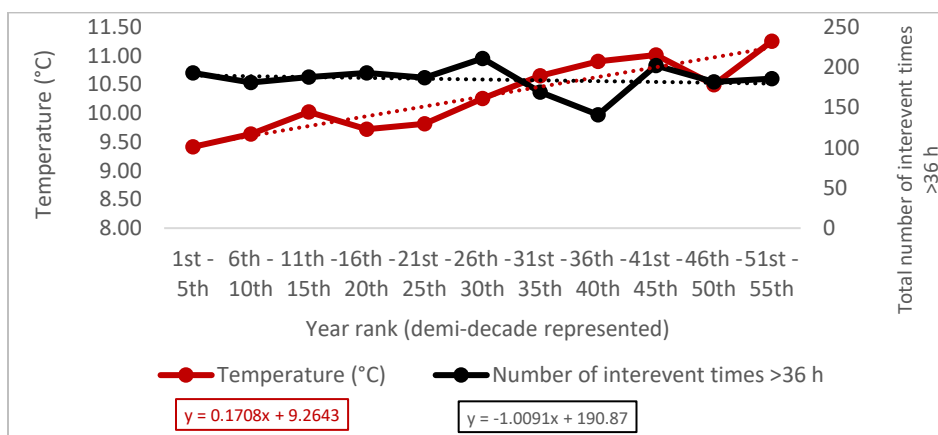

Fig. S3.7 Demi-decade-averaged temperature and demi-decade total number of interevent times >36 h plot for Wales' station

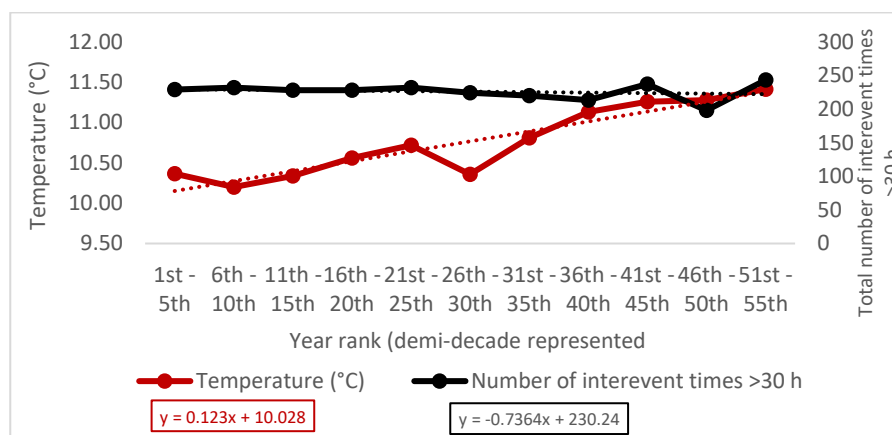

Fig. S3.8 Demi-decade-averaged temperature and demi-decade total number of interevent times >30 h plot for Northern Ireland's station
